# Supplementary material
Source: publisher figshare collection journal article supplement (https://acs.figshare.com/ndownloader/files/10164411)
Supplement: Supplementary file 1 [file 10164411]

## Supporting Information for

# Fast Lithium-Ion Conduction in Atom-Deficient *closo*-Type Complex Hydride Solid Electrolytes

Sangryun Kim,<sup>†</sup> Naoki Toyama,<sup>†</sup> Hiroyuki Oguchi,<sup>‡</sup> Toyoto Sato,<sup>†</sup> Shigeyuki Takagi,<sup>†</sup> Tamio Ikeshoji,<sup>†</sup> and Shin-ichi Orimo,<sup>†,‡</sup>

<sup>†</sup>Institute for Materials Research, Tohoku University, Katahira 2-1-1, Aoba-ku, Sendai 980-8577, Japan

<sup>‡</sup>WPI-Advanced Institute for Materials Research (WPI-AIMR), Tohoku University, Katahira 2-1-1, Aoba-ku, Sendai 980-8577, Japan

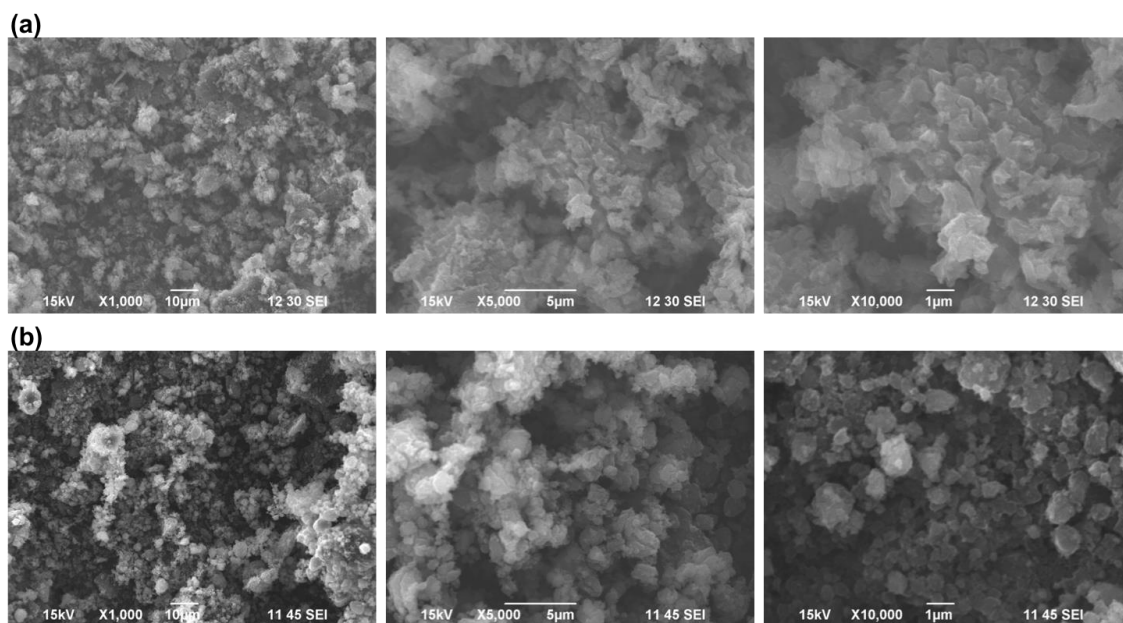

**Figure S1.** SEM images of (a) pristine and (b) ball-milled  $\text{Li}_2\text{B}_{12}\text{H}_{12}$  at various magnifications.

**Table S1.** Ratios of integral intensities of the (021) and (111) peaks.

|                                  | $I_{(021)}/I_{(111)}$ |
|----------------------------------|-----------------------|
| Pristine                         | 0.015                 |
| Ball-milled                      | 0.008                 |
| Disordered HT phase <sup>1</sup> | $\sim 0$              |

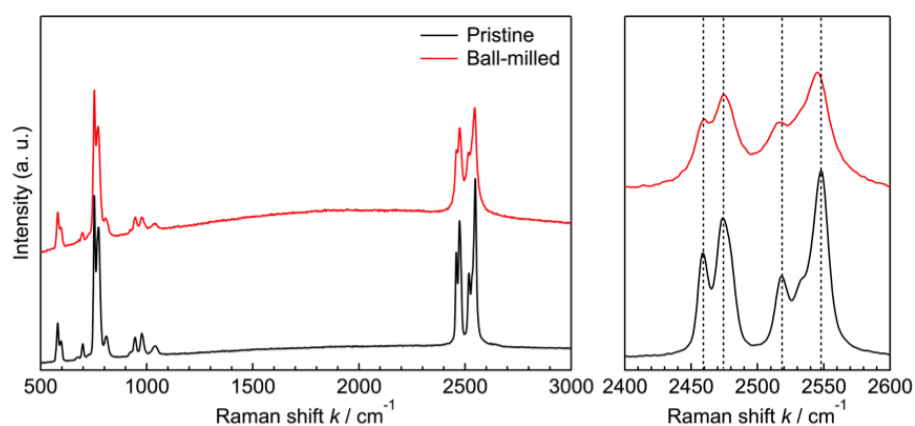

**Figure S2.** Raman spectra of pristine and ball-milled  $\text{Li}_2\text{B}_{12}\text{H}_{12}$ .

After ball-milling, the Raman peaks at  $\sim 2520$  and  $2550\text{ cm}^{-1}$  resulting from B-H stretching modes are shifted to lower wavelength, indicating the local distortion of B-H bonding in the ball-milled sample.

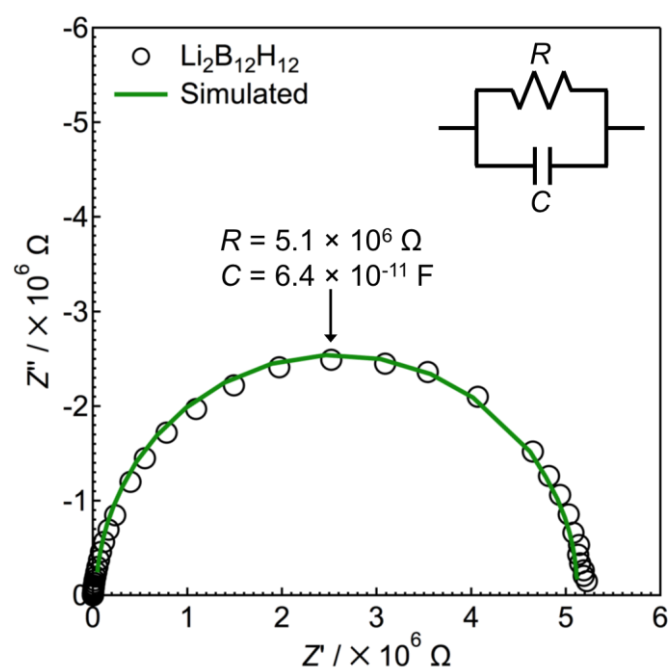

**Figure S3.** Nyquist plot and simulated curve for pristine  $\text{Li}_2\text{B}_{12}\text{H}_{12}$  at 30 °C. The inset shows the equivalent circuit that was used for fitting.

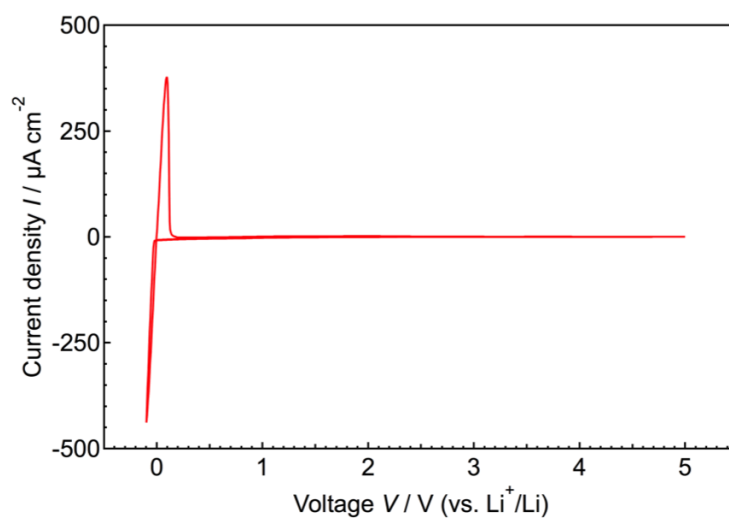

**Figure S4.** CV curve of an SS/ball-milled  $\text{Li}_2\text{B}_{12}\text{H}_{12}/\text{Li}$  cell at a scan rate of  $5 \text{ mV s}^{-1}$  and a scan range of  $-0.1$  to  $5 \text{ V (vs. Li}^+/\text{Li)}$ .

## References

- (1) Paskevicius, M.; Pitt, M. P.; Brown, D. H.; Sheppard, D. A.; Chumphongphan, S.; Buckley, C. E. First-order phase transition in the  $\text{Li}_2\text{B}_{12}\text{H}_{12}$  system. *Phys. Chem. Chem. Phys.* **2013**, *15*, 15825-15828.
